# Supplementary material for: Antimicrobial Resistance Patterns and Risk Factors Associated with Salmonella spp. Isolates from Poultry Farms in the East Coast of Peninsular Malaysia: A Cross-Sectional Study
Source: MDPI journal article supplement (doi:10.3390/pathogens10091160), 2021-09-09
Supplement: s1 [file s1]

**Table S1.** Characteristics of 31 farmers /farms in Kelantan, Terengganu, and Pahang states, Malaysia.

| Variables                                        | Household farms |
|--------------------------------------------------|-----------------|
| <b>Demographic characteristics of the farmer</b> |                 |
| Age of farm manager (years), median (IQR)        | 45( 39-54)      |
| Gender                                           |                 |
| Female                                           | 5(16.1%)        |
| Male                                             | 26 (83.9%)      |
| Education                                        |                 |
| Primary                                          | 9(29.0%)        |
| Secondary                                        | 14(45.2%)       |
| College                                          | 8(25.8%)        |
|                                                  |                 |
| <b>Characteristics of 31 farms</b>               |                 |
| Use of antibiotics                               |                 |
| Yes                                              | 31 (100%)       |
| No                                               | 0               |
| Vaccines                                         |                 |
| Yes                                              | 31(100%)        |
| No                                               | 0               |
| Recent disease history                           |                 |
| Yes                                              | 22(71.0%)       |
| No                                               | 9(29.0%)        |
| Animal contact                                   |                 |
| Yes                                              | 2 (6.5%)        |
| No                                               | 29(93.5%)       |
| Production system                                |                 |
| Broiler                                          | 16(51.6%)       |
| Layer                                            | 5(16.1%)        |
| Mixed                                            | 10 (32.3%)      |
| Management system                                |                 |
| Intensive                                        | 16(51.6%)       |
| Semi-intensive                                   | 12 (38.7%)      |
| Mixed                                            | 3(9.7%)         |
| Farm size                                        |                 |
| Small                                            | 10(32.3%)       |
| Medium                                           | 13(41.9%)       |
| Large                                            | 8(25.8%)        |
| Flock origin                                     |                 |
| Local                                            | 3(9.7%)         |
| Imported                                         | 9(29.0%)        |
| Both                                             | 19(61.3%)       |
| States                                           |                 |
| Kelantan                                         | 13(41.9%)       |
| Terengganu                                       | 7(22.6%)        |
| Pahang                                           | 11(35.5%)       |
| Districts                                        |                 |
| Bachok                                           | 2(6.5%)         |
|                                                  |                 |

|                      |            |
|----------------------|------------|
| Kota Bharu           | 3(9.7%)    |
| Machang              | 1(3.2%)    |
| Pasir Mas            | 2(6.5%)    |
| Pasir Puteh          | 2(6.5%)    |
| Jeli                 | 3(9.7%)    |
| Kuantan              | 6(19.4%)   |
| Maran                | 1(3.2%)    |
| Pekan                | 4(12.9%)   |
| Kuala terengganu     | 3(9.7%)    |
| Marang               | 4(12.9%)   |
| Sewage system        |            |
| Excellent            | 11(35.5%)  |
| Good                 | 17(54.8%)  |
| Poor                 | 3(9.7%)    |
| Visitors             |            |
| Yes                  | 19(61.3%)  |
| No                   | 12(38.7%)  |
| PPE                  |            |
| Yes                  | 19(61.3%)  |
| No                   | 12(38.7%)  |
| Washing facilities   |            |
| Yes                  | 25(80.6%)  |
| No                   | 6(19.4%)   |
| Use of disinfectant  |            |
| Yes                  | 21(67.7%)  |
| No                   | 10(32.3%)  |
| Source of antibiotic |            |
| Drug supplier        | 20(64.5%)  |
| Feed store           | 11(35.5%)  |
| Veterinary services  |            |
| Yes                  | 31(100%)   |
| No                   | 0          |
| Source of feed       |            |
| Endogenous           | 12(38.7%)  |
| Exogenous            | 16(51.6%)  |
| Water source         |            |
| Surface water        | 6(19.4%)   |
| Bond water           | 13(41.9%)  |
| Pump water           | 12 (38.7%) |

**Table S2.** Summary of prevalence of resistance to at least one antimicrobial and their associated risk factors.

| <b>Risk Factors</b>   | <b>No antimicrobial resistance<br/>(n = 24)</b> | <b>Resistance to at least one antimicrobial (n = 153)</b> |
|-----------------------|-------------------------------------------------|-----------------------------------------------------------|
| Age                   |                                                 |                                                           |
| Young                 | 12(50%)                                         | 74(48.4%)                                                 |
| Adult                 | 12(50%)                                         | 79(51.6%)                                                 |
| Origin of the poultry |                                                 |                                                           |
| Local                 | 3(12.5%)                                        | 9(5.9%)                                                   |
| Imported              | 5(20.8%)                                        | 68(44.4%)                                                 |
| Both                  | 16(66.7%)                                       | 76(49.7%)                                                 |
| Management system     |                                                 |                                                           |
| Intensive             | 7(29.2%)                                        | 88(57.5%)                                                 |
| Semi-intensive        | 14(58.3)                                        | 56(36.6%)                                                 |
| Mixed                 | 3(12.5%)                                        | 9(5.9%)                                                   |
| Production System     |                                                 |                                                           |
| Broiler               | 13(54.2%)                                       | 96(62.7%)                                                 |
| Layer                 | 1(4.2%)                                         | 24(15.7%)                                                 |
| Mixed                 | 10(41.7%)                                       | 33(21.6%)                                                 |
| Farm size             |                                                 |                                                           |
| Small                 | 9(37.5%)                                        | 41(26.8%)                                                 |
| Medium                | 14(58.3%)                                       | 83(54.2%)                                                 |
| Large                 | 1(4.2%)                                         | 29(19%)                                                   |
| Source of sample      |                                                 |                                                           |
| Cloacal swab          | 20(83.3%)                                       | 100(65.4%)                                                |
| Faecal sample         | 0                                               | 50(32.7%)                                                 |
| sewage                | 2(8.3%)                                         | 3(2%)                                                     |
| Tap water             | 2(8.3%)                                         | 0                                                         |
| Water source          |                                                 |                                                           |
| Surface water         | 6(25%)                                          | 32(20.9%)                                                 |
| Bond water            | 7(29.2%)                                        | 65(42.5%)                                                 |
| Pump water            | 11(45.8%)                                       | 56(36.6%)                                                 |
| Sewage system         |                                                 |                                                           |
| Excellent             | 4(16.7%)                                        | 60(39.2%)                                                 |
| Good                  | 16(66.7%)                                       | 76(49.7%)                                                 |
| Poor                  | 4(16.7%)                                        | 17(11.1%)                                                 |
| Feed source           |                                                 |                                                           |
| Endogenous            | 8(33.3%)                                        | 53(34.6%)                                                 |
| Exogenous             | 15(62.5%)                                       | 88(57.5%)                                                 |
| Other                 | 1(4.2%)                                         | 12(7.8%)                                                  |
| Farms                 |                                                 |                                                           |
| Farm 1                | 0                                               | 16(10.5%)                                                 |

|         |          |           |
|---------|----------|-----------|
| Farm 2  | 3(12.5%) | 9(5.9%)   |
| Farm 3  | 3(12.5%) | 6(3.9%)   |
| Farm 4  | 1(4.2%)  | 12(7.8%)  |
| Farm 5  | 5(20.8%) | 12(7.8%)  |
| Farm 6  | 4(16.7%) | 8(5.2%)   |
| Farm 7  | 0        | 7(4.6%)   |
| Farm 8  | 0        | 12(7.8%)  |
| Farm 9  | 1(4.2%)  | 8(5.2%)   |
| Farm 10 | 1(4.2%)  | 17(11.1%) |
| Farm 11 | 3(12.5%) | 20(13%)   |
| Farm 12 | 0        | 10(6.5%)  |
| Farm 13 | 1(4.2%)  | 7(4.6%)   |
| Farm 14 | 2(8.3%)  | 9(5.9%)   |

**Table S3.** Number of samples per farm in east coast of peninsular Malaysia

| Farms   | Cloacal swabs | Faecal | Sewage | Tap water |
|---------|---------------|--------|--------|-----------|
| Farm 1  | 20            | 6      | 1      | 1         |
| Farm 2  | 18            | 6      | 1      | 1         |
| Farm 3  | 18            | 6      | 1      | 1         |
| Farm 4  | 18            | 6      | 1      | 1         |
| Farm 5  | 18            | 6      | 1      | 1         |
| Farm 6  | 18            | 6      | 1      | 1         |
| Farm 7  | 20            | 5      | 1      | 1         |
| Farm 8  | 18            | 7      | 1      | 1         |
| Farm 9  | 18            | 6      | 1      | 1         |
| Farm 10 | 18            | 6      | 1      | 1         |
| Farm 11 | 19            | 6      | 1      | 1         |
| Farm 12 | 18            | 6      | 1      | 1         |
| Farm 13 | 18            | 6      | 1      | 1         |
| Farm 14 | 20            | 6      | 1      | 1         |
| Total   | 259           | 84     | 14     | 14        |

**Table S4.** The set of primers used for each gene.

| Genes                           | Primer sequence(5'to3')                          | PCR condition                                                                                          | Product size | References |
|---------------------------------|--------------------------------------------------|--------------------------------------------------------------------------------------------------------|--------------|------------|
| Tetracyclines<br><i>tetA</i>    | F GTAATTCTGAGCACTGTCTG<br>R CTGCCTGGACAACATTGCCT | 3 min at 94 °C; 30 cycles of 30 s at<br>94 °C, 30 s at 62 °C and 1 min at 72 °C;<br>7 min at 72 °C     | 957          | [48]       |
| Tetracyclines<br><i>tetB</i>    | F CTCAGTATTCCAAGCCTTTG<br>R ACTCCCCTGAGCTTGAGGGG | 3 min at 94 °C; 30 cycles of 30 s at<br>94 °C, 30 s at 62 °C and 1 min at 72 °C;<br>7 min at 72 °C     | 414          | [49]       |
| Sulfonamide<br><i>sul1</i>      | F TCACCGAGGACTCCTTCTTC<br>R CAGTCCGCCTCAGCAATATC | 3 min at 94 °C; 30 cycles of 30 s at<br>94 °C, 30 s at 53 °C and 1 min at 72 °C;<br>7 min at 72 °C     | 331          | [50]       |
| Sulfonamide<br><i>Sul2</i>      | F GCGCTCAAGGCAGATGGCAT<br>R GCGTTTGATACCGGCACCCT | 3 min at 94 °C; 30 cycles of 30 s at<br>94 °C, 30 s at 53 °C and 1 min at 72 °C;<br>7 min at 72 °C     | 293          | [48]       |
| Chloramphenic<br>ol <i>cat1</i> | F CTTGTCGCCTTGCGTATAAT<br>R AACGGCATGATGAACCTGA  | 10 min at 95 °C; 30 cycles of 30 s at<br>95 °C, 1 min at 55 °C and 1 min at<br>72 °C; 7min 72 °C       | 508          | [50]       |
| Chloramphenic<br>ol <i>Cat2</i> | F AACGGCATGATGAACCTGAA<br>R ATCCCAATGGCTCGTAAAG  | 10 min at 95 °C; 30 cycles of 30 s at<br>95 °C, 1 min at 55 °C and 1 min at<br>72 °C; 7min 72 °C       | 547          | [50]       |
| Chloramphenic<br>ol <i>floR</i> | F CTGAGGGTGTCTCATCTAC<br>R GCTCCGACAATGCTGACTAT  | 10 min at 95 °C; 30 cycles of 30 s at<br>95 °C, 1 min at 55 °C and 1 min at<br>72 °C; 7min 72 °C       | 673          | [50]       |
| <i>blaTEM</i>                   | F ATGAGTATTCAACATTTCCG<br>R ACCAATGCTTAATCAGTGAG | 3 min at 94 °C; 25 cycles of 1 min at<br>94 °C, 1 min. at 50 °C and 1 min at<br>72 °C; 10 min at 72 °C | 857          | [49]       |

**Table S5.** The biochemical characteristics and PCR confirmation of *Salmonella* spp.

| The biochemical characteristics of <i>Salmonella</i> spp                |                                                                                                 |              |
|-------------------------------------------------------------------------|-------------------------------------------------------------------------------------------------|--------------|
| Characteristics                                                         | <i>Salmonella</i>                                                                               |              |
| Simmons citrate                                                         | +ve                                                                                             |              |
| Urease                                                                  | -ve                                                                                             |              |
| Indole                                                                  | -ve                                                                                             |              |
| Methyl red                                                              | +ve                                                                                             |              |
| Triple Sugar Iron (TSI)                                                 | Alkaline/Acid, gas                                                                              |              |
| H <sub>2</sub> S                                                        | +ve                                                                                             |              |
| Lysine Iron Agar                                                        | +ve                                                                                             |              |
| PCR confirmation of <i>Salmonella</i> spp.                              |                                                                                                 |              |
| Primer sequence(5'to3')                                                 | PCR condition                                                                                   | Product size |
| F GTG AAA TTA TCG CCA CGT TCG GGC AA<br>R TCA TCG CAC CGT CAA AGG AAC C | 1 min at 94 °C; 35 cycles of 1 min at 94 °C, 30 s at 55 °C and 45 s min at 72 °C; 7min at 72 °C | 284 bp       |
